# Supplementary material for: Triacylglycerol Storage in Lipid Droplets in Procyclic Trypanosoma brucei
Source: PLoS One. 2014 Dec 10;9(12):e114628. doi: 10.1371/journal.pone.0114628 (PMC4262433; doi:10.1371/journal.pone.0114628)
Supplement: S4 Figure — Proteomic analysis of a glycosomal preparation. From proteome analysis of the glycosome enriched fraction from WT and Δtfeα1/Δtfeα1 cell lines, only the glycosomal enzymes, identified with high confidence (group III) in Güther et al [40] are shown in this table. The TriTrypDB ID and name of each protein is indicated in the 1st and 2nd columns. The data represent the SEM of 3 analyses of the same samples (technical replicate). Log10 of the “mean” values are used in Figure 5B. The last column indicates the ratio between the WT and Δtfeα1/Δtfeα1 data. (XLS) [file pone.0114628.s004.xls]

## Sheet: Analyse TFE-1 (2)
			NUMBER OF	NUMBER OF	CONFIDENCE	WT			Δtfeα1/Δtfeα1			RATIO
	ID	PROTEIN NAME	PEPTIDES	PEPTIDES	SCORE							WT/
			DETECTED	ANALYSED		MEAN	±SD	±SD (%)	MEAN	±SD	±SD (%)	Δtfeα1
	Tb927.11.5520	triosephosphate isomerase (TIM)	55	55	2525.69	1.86331e+09	1.52977e+08	8.21001	1.77839e+09	2.1472e+08	12.0739	1.04775
	Tb927.2.4210	glycosomal phosphoenolpyruvate carboxykinase (PEPCK)	121	118	5729.89	1.80892e+09	3.41867e+07	1.8899	2.50873e+09	2.28826e+08	9.12118	0.72105
	Tb927.6.4300	glyceraldehyde 3-phosphate dehydrogenase, glycosomal (GAPDH)	59	56	2648.87	1.75333e+09	1.45878e+08	8.32008	1.45971e+09	1.56567e+08	10.7259	1.20115
	Tb927.9.12590	glycerol kinase, glycosomal (glk1)	101	98	4741.85	1.53723e+09	2.60457e+07	1.69433	1.44946e+09	1.3576e+08	9.36624	1.06055
	Tb927.10.15410	glycosomal malate dehydrogenase (gMDH)	33	31	1751.24	1.07181e+09	1.09388e+08	10.2059	9.49222e+08	6.32989e+07	6.6685	1.12915
	Tb927.8.3530	glycerol-3-phosphate dehydrogenase [NAD ], glycosomal (GPDH)	53	52	2386.41	5.38829e+08	5.51455e+06	1.02343	6.72535e+08	4.04801e+07	6.01903	0.80119
	Tb927.11.6280	pyruvate phosphate dikinase (PPDK)	125	122	5494.33	4.37877e+08	2.24518e+07	5.12743	4.32518e+08	4.02111e+07	9.29699	1.01239
	Tb927.10.5620	fructose-bisphosphate aldolase, glycosomal (ALD)	44	43	2054.15	2.38279e+08	1.32625e+07	5.56598	2.72654e+08	2.77257e+07	10.1688	0.873922
	Tb927.10.16120	inosine-5'-monophosphate dehydrogenase,IMP dehydrogenase	52	51	2670.27	1.64704e+08	2.55965e+06	1.55409	1.81794e+08	2.97239e+07	16.3503	0.905991
	Tb927.7.7500	thymine-7-hydroxylase, putative (TLP7)	34	31	1323.11	1.39113e+08	4.34653e+06	3.12447	1.58403e+08	2.69164e+07	16.9924	0.878221
	Tb927.11.1020	ribokinase (RK)	22	22	1058.89	1.28915e+08	7.05285e+06	5.47094	1.15506e+08	1.04187e+07	9.02007	1.11609
	Tb927.8.6170	transketolase, putative (TK)	38	37	1669.57	1.09371e+08	4.53802e+06	4.14918	1.32667e+08	1.17163e+07	8.8314	0.824408
	Tb927.10.1390	hypoxanthine-guanine phosphoribosyltransferase (HGPRT)	27	27	1326.6	1.05905e+08	4.98552e+06	4.70755	1.17275e+08	1.91836e+07	16.3579	0.90305
	Tb927.8.7410	calreticulin, putative	37	37	1280.65	9.14022e+07	4.32082e+06	4.72727	9.98989e+07	1.18277e+07	11.8397	0.914947
	Tb927.5.930	NADH-dependent fumarate reductase (FRDg)	73	35	3114.27	6.60716e+07	3.1158e+06	4.7158	6.0737e+07	4.22826e+06	6.96158	1.08783
	Tb927.11.14780	phosphomannose isomerase, putative	30	30	1206.8	6.15397e+07	1.55217e+06	2.52222	6.97837e+07	9.4416e+06	13.5298	0.881863
	Tb927.3.3270	ATP-dependent phosphofructokinase (TbPFK)	44	42	1841.77	5.51158e+07	927590	1.68298	6.63151e+07	5.30523e+06	8.00003	0.831119
	Tb927.11.900	isocitrate dehydrogenase, putative (IDH)	39	36	1541.75	4.79004e+07	1.20353e+06	2.51256	4.64617e+07	6.99344e+06	15.052	1.03097
	Tb927.11.11520	glycosomal membrane protein (PEX11)	13	13	572.796	3.83915e+07	524180	1.36535	2.55258e+07	628633	2.46273	1.50403
	Tb927.4.4070	mevalonate kinase (MK)	16	16	657.652	3.8339e+07	2.37783e+06	6.20212	4.20182e+07	9.28197e+06	22.0903	0.912438
	Tb927.1.3830	glucose-6-phosphate isomerase, glycosomal (PGI)	34	34	1399.13	3.20675e+07	782098	2.43891	3.91865e+07	4.81015e+06	12.275	0.818329
	Tb927.10.2020	hexokinase (HK2)	28	28	1374.54	2.82253e+07	1.0498e+06	3.71936	2.58833e+07	2.84009e+06	10.9727	1.09049
	Tb927.3.3780	tryparedoxin	8	7	284.662	2.29305e+07	1.24019e+06	5.40847	1.43367e+07	1.29373e+06	9.0239	0.625224
	Tb927.10.10390	trypanothione reductase	21	19	833.452	1.835e+07	1.56767e+06	8.54317	1.181e+07	429244	3.63459	1.55377
	Tb927.5.2080	guanosine monophosphate reductase, putative	23	23	993.048	1.76872e+07	800817	4.52768	1.9108e+07	2.08727e+06	10.9236	0.925643
	Tb927.4.1360	hypothetical protein, conserved	15	14	577.742	1.65246e+07	533159	3.22645	1.74712e+07	2.44477e+06	13.9931	0.945821
	Tb927.7.1790	Adenine phosphoribosyltransferase, putative	17	17	743.178	1.6155e+07	543777	3.366	1.71295e+07	2.92823e+06	17.0947	0.943112
	Tb927.6.1500	alkyl-dihydroxyacetone phosphate synthase (DHAP)	23	23	765.401	1.33057e+07	247620	1.86101	1.05488e+07	1.75985e+06	16.683	1.26135
	Tb927.8.6390	lysophospholipase, putative,alpha/beta hydrolase, putative (TbLysoPLA)	20	18	760.69	1.32523e+07	829452	6.25894	1.65912e+07	3.48249e+06	20.9899	0.798753
	Tb927.8.7170	inositol polyphosphate 1-phosphatase, putative	15	15	617.42	1.21222e+07	67771.7	0.559071	1.33563e+07	1.44372e+06	10.8093	0.907605
	Tb927.5.3810	orotidine-5-phosphate decarboxylase/orotate phosphoribosyltransferase (OMPDCase-OPRTase)	24	23	852.364	1.17316e+07	254286	2.16752	1.2891e+07	1.713e+06	13.2883	0.910066
	Tb927.11.15910	iron superoxide dismutase	5	2	264.37	8.92735e+06	660367	7.39712	7.83316e+06	297045	3.79215	1.13969
	Tb927.10.5760	adenylate kinase (AK)	11	11	325.356	5.63896e+06	207864	3.68622	7.08665e+06	436722	6.1626	0.795715
	Tb927.10.1470	hypoxanthine-guanine phosphoribosyltransferase (HGPRT)	11	11	459.387	5.28728e+06	306659	5.79994	5.68783e+06	1.22234e+06	21.4904	0.929578
	Tb927.6.3050	aldehyde dehydrogenase family, putative	17	17	678.11	5.18225e+06	100802	1.94513	4.34736e+06	622180	14.3117	1.19205
	Tb927.10.2490	glucose-6-phosphate 1-dehydrogenase (G6PD)	12	12	386.562	5.10044e+06	128736	2.52401	4.41677e+06	331562	7.50688	1.15479
	Tb927.7.5680	deoxyribose-phosphate aldolase, putative	12	12	493.64	4.85725e+06	397342	8.1804	5.14238e+06	201134	3.91131	0.944553
	Tb927.10.9890	hypothetical protein, conserved	17	17	567.043	4.7877e+06	1.40836e+06	29.4162	3.83808e+06	651186	16.9664	1.24742
	Tb927.10.13130	UTP-glucose-1-phosphate uridylyltransferase	19	19	681.985	4.68619e+06	333175	7.10972	5.40529e+06	249391	4.61384	1.15345
	Tb927.11.5180	hypothetical protein, conserved	13	13	454.822	4.39402e+06	297079	6.76098	5.7003e+06	342701	6.01198	1.29729
	Tb927.8.6640	hypothetical protein, conserved	14	14	574.558	4.18448e+06	812651	19.4206	8.93269e+06	425582	4.76431	0.468446
	Tb927.11.9920	polyubiquitin, putative	5	5	125.175	3.57044e+06	83765.5	2.34608	2.2618e+06	141703	6.26504	0.633479
	Tb927.9.6090	PTP1-interacting protein, 39 kDa	41	4	1393	3.51168e+06	378483	10.7778	6.071e+06	680299	11.2057	0.578436
	Tb927.5.4350	NUDIX hydrolase, putative	6	6	120.79	3.36696e+06	332456	9.87409	4.44517e+06	151084	3.39883	0.757442
	Tb927.6.2200	hypothetical protein, conserved	7	7	204.13	2.82082e+06	99925.2	3.54242	2.3272e+06	148505	6.38128	1.21211
	Tb927.9.6100	TFIIF-stimulated CTD phosphatase, putative	38	1	1321.18	2.47199e+06	70676.9	2.85911	2.90825e+06	439787	15.1221	0.849992
	Tb927.8.1910	acetylornithine deacetylase, putative,metallo-peptidase, Clan MH, Family M18 (ArgE)	5	5	234.54	2.32887e+06	169831	7.29241	2.01222e+06	87420.7	4.3445	1.15737
	Tb927.9.11600	unspecified product (gim5B)	32	3	1681.15	2.24657e+06	229566	10.2185	1.86805e+06	320764	17.1711	1.20263
	Tb927.10.240	peroxin 14, putative (PEX14)	6	6	259.09	1.99836e+06	147260	7.36904	1.94126e+06	50446.3	2.59863	1.02941
	Tb927.7.1130	trypanothione/tryparedoxin dependent peroxidase 2,glutathione peroxidase-like 2 (TDPX2)	8	2	283.33	1.9129e+06	48254.5	2.52259	1.35449e+06	68865.9	5.08429	1.41227
	Tb927.9.9000	isopentenyl-diphosphate delta-isomerase (type II), putative	9	9	222.068	1.78282e+06	122912	6.89423	2.49213e+06	689665	27.6738	0.715382
	Tb927.9.10310	mitochondrial carrier protein (MCP11)	8	8	253.1	1.51749e+06	91381.7	6.02189	2.28436e+06	119954	5.25109	1.50535
	Tb927.9.8720	fructose-1,6-bisphosphatase (FBPase)	7	7	230.543	1.44346e+06	38432.1	2.6625	1.13322e+06	14297.7	1.26169	1.27377
	Tb927.9.11580	Gim5A protein,glycosomal membrane protein (gim5A)	35	6	1732.39	1.3792e+06	114013	8.26663	1.23288e+06	118656	9.62431	1.11868
	Tb927.3.1840	3-oxo-5-alpha-steroid 4-dehydrogenase, putative	3	3	69.32	1.36229e+06	46821.5	3.43697	2.28839e+06	170911	7.4686	1.67981
	Tb927.2.5800	sedoheptulose-1,7-bisphosphatase (SBPase)	7	7	192.7	1.30174e+06	36028.3	2.76771	1.14916e+06	106183	9.24007	1.13277
	Tb927.9.4210	fatty acyl CoA synthetase 3 (ACS3)	5	5	160.11	1.28104e+06	101193	7.89931	1.25425e+06	80663.8	6.43122	1.02135
	Tb927.3.4420	hypothetical protein, conserved	9	9	297.023	1.25844e+06	206469	16.4067	2.12333e+06	75720.6	3.56613	0.592675
	Tb927.3.2340	peroxin-2,glycosome import protein (gim1) (PEX2)	3	3	155.37	1.07283e+06	74080.1	6.90508	1.20667e+06	79194.9	6.56311	0.88909
	Tb927.10.10610	protein tyrosine phosphatase, putative	2	2	89.73	978287	60166.4	6.15018	1.07128e+06	107056	9.99323	1.09506
	Tb927.11.15020	iron superoxide dismutase (TbSODB)	5	2	204.36	943375	39785.6	4.21737	885297	155980	17.6189	1.0656
	Tb927.1.720	phosphoglycerate kinase (PGKA)	12	4	343.65	842113	47781.3	5.67397	674257	88742.7	13.1616	1.24895
	Tb927.11.2620	hypothetical protein, conserved	7	7	202.906	837654	34739.4	4.14723	909963	27107.2	2.97894	0.920537
	Tb927.5.2590	hypothetical protein, conserved	3	3	127.93	815653	80322.1	9.84758	1.19007e+06	325566	27.3568	0.68538
	Tb927.10.6810	guanylate kinase, putative	5	4	236.14	785251	92549.4	11.786	637326	37858.2	5.94016	1.2321
	Tb927.9.4190	fatty acyl CoA syntetase 1 (ACS1)	8	7	219.893	748497	8828.81	1.17954	732806	51577.6	7.03837	1.02141
	Tb927.11.2380	phosphoglycerate kinase, putative	1	1	2.19704	623199	118451	19.0069	416533	7596.66	1.82378	0.668379
	Tb927.11.1070	glycosomal transporter (GAT3), putative	4	4	223.62	482545	37748.7	7.82284	438514	58596	13.3624	1.10041
	Tb927.10.8410	hypothetical protein, conserved	3	3	58.6399	459739	23103.2	5.02529	465506	25401.4	5.45674	0.987611
	Tb927.11.6330	splicing factor Prp31 (6PGL)	4	4	114.19	447412	26323.1	5.88341	331616	10098.6	3.04527	0.741189
	Tb927.11.2520	UDP-N-acetylglucosamine pyrophosphorylase, putative	4	4	175.13	447112	32978.5	7.37587	471168	57707.4	12.2477	0.948944
	Tb927.2.4130	enoyl-CoA hydratase/Enoyl-CoA isomerase/3-hydroxyacyl-CoA dehydrogenase	2	2	47.55	368458	53899.6	14.6284	2643.16	4578.08	173.205	139.401
	Tb927.9.6450	hypothetical protein, conserved	2	2	55.7482	348164	30704.1	8.81886	371519	23500	6.32537	0.937136
	Tb927.7.1140	trypanothione/tryparedoxin dependent peroxidase 3 (TDPX3)	7	1	210.987	306761	48177.1	15.7051	184177	32983.2	17.9085	1.66558
	Tb927.5.2370	hydrolase, alpha/beta fold family, putative	4	4	113.816	289316	17479.1	6.04152	225927	135331	59.9003	1.28058
	Tb927.1.5000	hypothetical protein, conserved	3	3	77.81	270417	12631.4	4.67108	286964	48879.1	17.0332	0.942339
	Tb927.11.10260	hypothetical protein, conserved	3	3	165.99	259302	17778.5	6.8563	396337	90007.4	22.7098	0.654245
	Tb927.5.1210	short-chain dehydrogenase, putative	3	2	109.26	197306	2898.27	1.46893	298241	13484.8	4.52145	1.51157
	Tb927.3.2410	peroxisome assembly protein, putative	1	1	2.53502	128200	23819.8	18.5802	132743	25756.1	19.403	0.965779
	Tb927.4.1600	hypothetical protein, conserved	1	1	62.71	116928	9703.54	8.29873	130205	11774.4	9.04296	0.898033
	Tb927.10.8630	hypothetical protein, conserved	1	1	46.18	102280	3377.05	3.30177	137867	25632	18.5918	1.34794
	Tb927.9.1720	peroxisomal membrane protein 4	1	1	47.81	85279.8	13868.8	16.2627	64199.3	6755.42	10.5226	1.32836
	Tb927.8.6080	hypothetical protein, conserved	2	2	4.14176	82135.3	4739.74	5.77065	106387	12420.7	11.6751	1.29527
	Tb927.10.3080	methionine biosynthetic protein, putative	1	1	21.3	71102.3	15138.8	21.2916	88822.6	18402.4	20.7181	1.24922
	Tb927.11.2730	UDP-galactose 4-epimerase (galE)	2	2	14.0532	57947.3	8171.89	14.1023	89115.9	5288.15	5.93401	0.650247
	Tb927.4.2010	acyl-CoA binding protein, putative (ACBP)	1	1	23.35	55640.6	4009.72	7.20647	27282.7	868.017	3.18156	2.03941
	Tb927.5.2650	L-galactonolactone oxidase (GAL/ALO)	1	1	72.32	32130.9	383.622	1.19393	59699	18496.3	30.9826	0.538216
	Tb927.3.5090	tryparedoxin, putative	3	2	49.0225	24859.2	1205.86	4.85075	21215.1	5115.1	24.1107	0.853411
	Tb927.4.3160	dihydroxyacetone phosphate acyltransferase, putative (DAT)	1	1	73.66	15679	2345.87	14.9619	25497.7	4995.48	19.5918	0.614917
